# Supplementary material for: Pleiotropic Associations of Allelic Variants in a 2q22 Region with Risks of Major Human Diseases and Mortality
Source: PubMed Central journal article supplement (PMC5104356; doi:10.1371/journal.pgen.1006314), 2016-11-10
Supplement: pgen.1006314.s004.pdf [file pgen.1006314.s004.pdf]

**Table S2. Sources of information for meta-analysis in Table 7 for columns “With improvements”.**

| <b>Outcomes</b> | <b>ARIC</b> | <b>FHS</b> | <b>FHS_C1</b>               | <b>FHSO</b> | <b>HRS</b>           |
|-----------------|-------------|------------|-----------------------------|-------------|----------------------|
| CHD             | Table 2     |            | Table 2, CHD <sub>65+</sub> | Table 3     | Table 2              |
| HF              | Table 2     |            | Table 5                     | Table 3     |                      |
| Stroke          | Table 2     | Table 2    |                             |             | Table 2              |
| Diabetes        | Table 2     |            | Table 3,   $\beta$          | Table 3     | Table 2              |
| Cancer          | Table 2     | Table 2    |                             |             | Table 2,   $\beta$   |
| ND              |             |            | Table 5                     |             |                      |
| Death           | Table 2     | Table 2    |                             |             | Table 5, cancer free |

In S2-S5 Tables we used the following notations:

Empty cells = not available or not estimated;

CHD = coronary heart disease;

CHD<sub>65+</sub> = coronary heart disease with onset at 65 years and older;

HF = heart failure;

ND = neurodegenerative diseases (ND, dementias including Alzheimer’s type).

|  $\beta$  | denotes modulus of the effect size beta.
