# Supplementary material for: Pleiotropic Associations of Allelic Variants in a 2q22 Region with Risks of Major Human Diseases and Mortality
Source: PubMed Central journal article supplement (PMC5104356; doi:10.1371/journal.pgen.1006314), 2016-11-10
Supplement: pgen.1006314.s005.pdf [file pgen.1006314.s005.pdf]

**Table S3. Sources of information for meta-analysis in Table 7 for columns “No improvements”.**

| <b>Outcomes</b> | <b>ARIC</b> | <b>FHS</b> | <b>FHS_C1</b> | <b>HRS</b> |
|-----------------|-------------|------------|---------------|------------|
| CHD             | Table 2     | Table 2    |               | Table 2    |
| HF              | Table 2     | Table 2    |               |            |
| Stroke          | Table 2     | Table 2    |               | Table 2    |
| Diabetes        | Table 2     | Table 2    |               | Table 2    |
| Cancer          | Table 2     | Table 2    |               | Table 2    |
| ND              |             |            | Table 3       |            |
| Death           | Table 2     | Table 2    |               | Table 2    |

In S2-S5 Tables we used the following notations:

Empty cells = not available or not estimated;

CHD = coronary heart disease;

CHD<sub>65+</sub> = coronary heart disease with onset at 65 years and older;

HF = heart failure;

ND = neurodegenerative diseases (ND, dementias including Alzheimer’s type).

$|\beta|$  denotes modulus of the effect size beta.
