# Supplementary material for: Pleiotropic Associations of Allelic Variants in a 2q22 Region with Risks of Major Human Diseases and Mortality
Source: PubMed Central journal article supplement (PMC5104356; doi:10.1371/journal.pgen.1006314), 2016-11-10
Supplement: pgen.1006314.s007.pdf [file pgen.1006314.s007.pdf]

**Table S5. Numerical estimates of the effect sizes  $\beta$  and standard errors (SE) used for meta-analysis in Table 7 for columns “No improvements”.**

|          | ARIC  |       | FHS   |       | HRS    |       |
|----------|-------|-------|-------|-------|--------|-------|
|          | beta  | SE    | beta  | SE    | beta   | SE    |
| CHD      | 0.555 | 0.105 | 0.070 | 0.139 | 0.099  | 0.113 |
| HF       | 0.406 | 0.148 | 0.416 | 0.170 |        |       |
| Stroke   | 0.166 | 0.230 | 0.530 | 0.182 | -0.003 | 0.164 |
| Diabetes | 0.303 | 0.149 | 0.053 | 0.172 | 0.298  | 0.115 |
| Cancer   | 0.199 | 0.163 | 0.212 | 0.100 | -0.269 | 0.136 |
| Death    | 0.275 | 0.116 | 0.494 | 0.102 | 0.265  | 0.133 |

In S2-S5 Tables we used the following notations:

Empty cells = not available or not estimated;

CHD = coronary heart disease;

CHD<sub>65+</sub> = coronary heart disease with onset at 65 years and older;

HF = heart failure;

ND = neurodegenerative diseases (ND, dementias including Alzheimer’s type).

|  $\beta$  | denotes modulus of the effect size beta.
